# Supplementary material for: Regulation of capillary tubules and lipid formation in vascular endothelial cells and macrophages via extracellular vesicle-mediated microRNA-4306 transfer
Source: PubMed Central journal article supplement — J Int Med Res. 2018 Nov 26;47(1):453–69. doi: 10.1177/0300060518809255 (PMC6384455; doi:10.1177/0300060518809255), 2018-11-26
Supplement: 809255_Supplementary_Material.pdf [file 809255_Supplementary_Material.pdf]

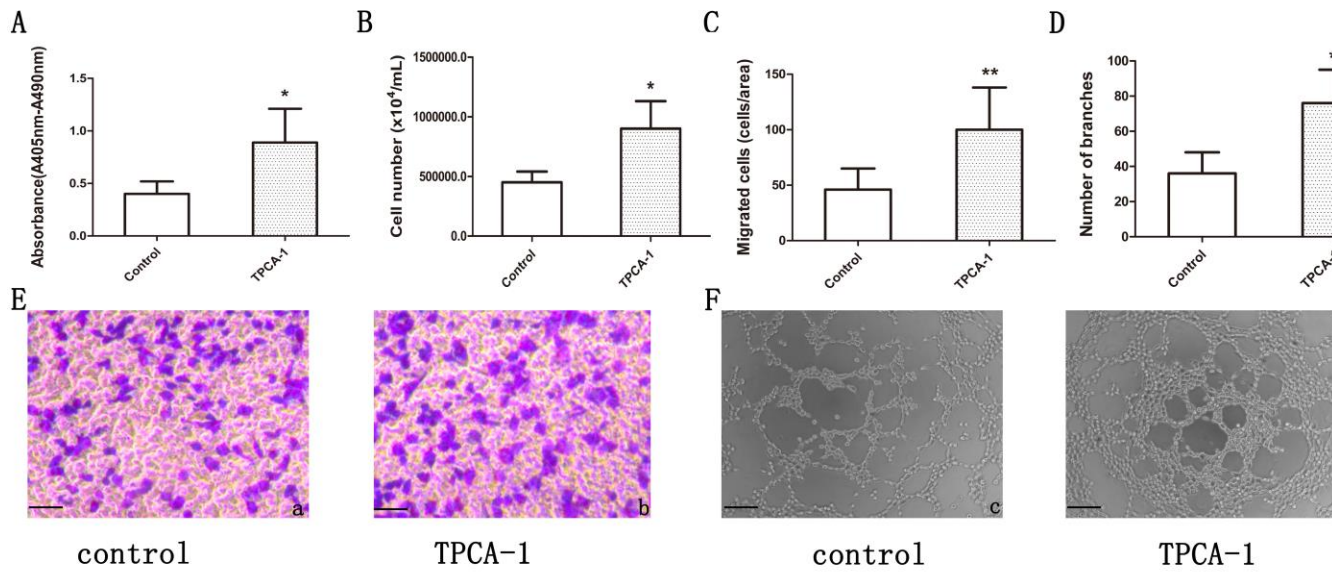

Supple fig 1

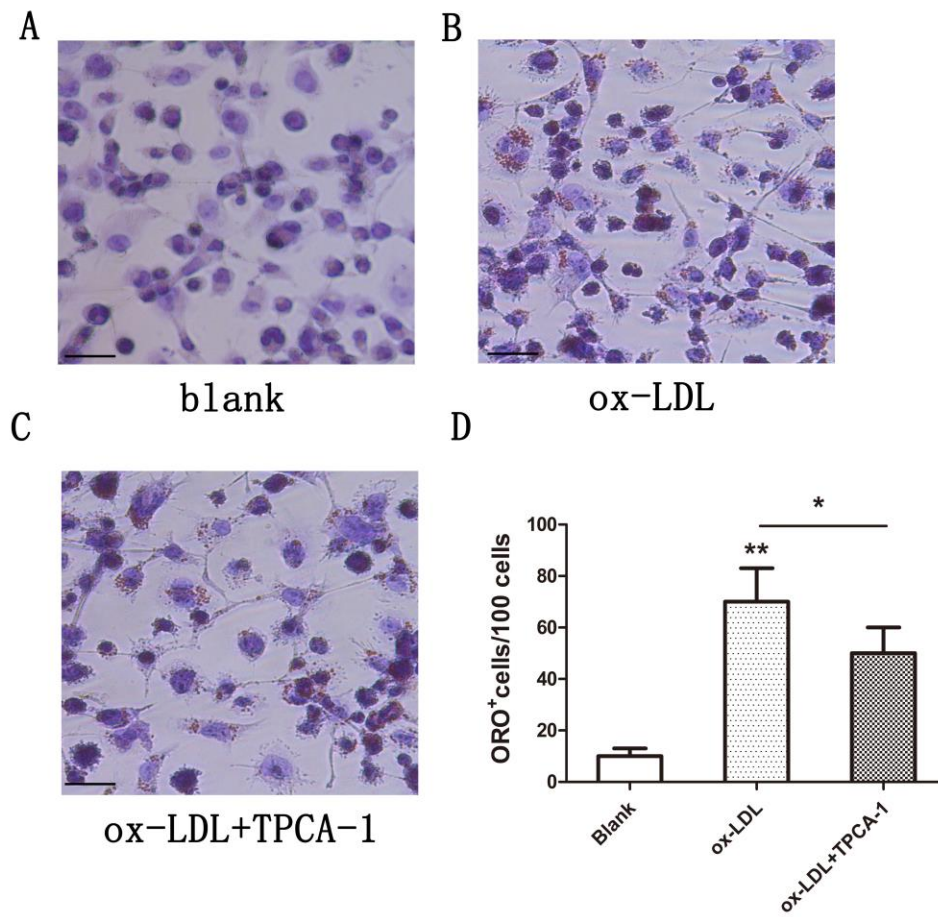

Supple fig 2

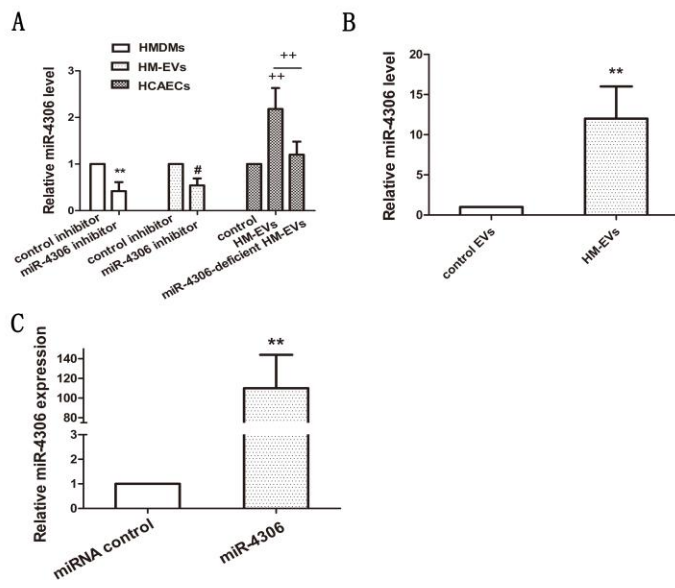

Supple fig 3

A

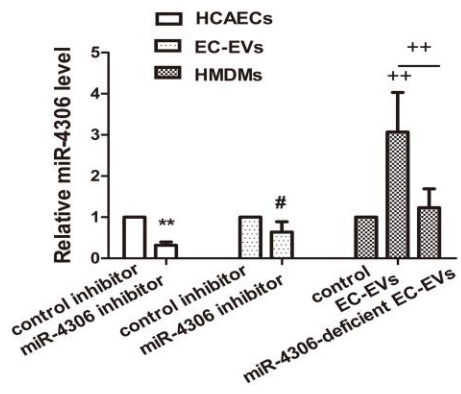

B

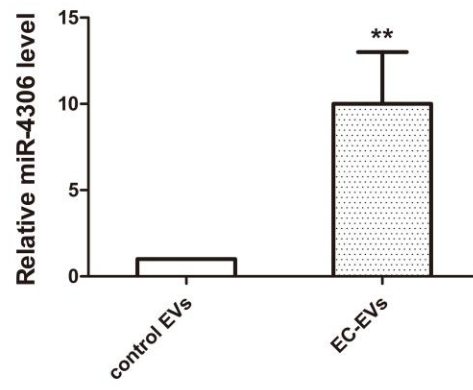

C

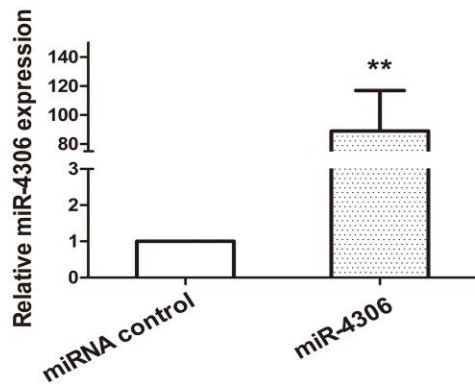

Supple 4

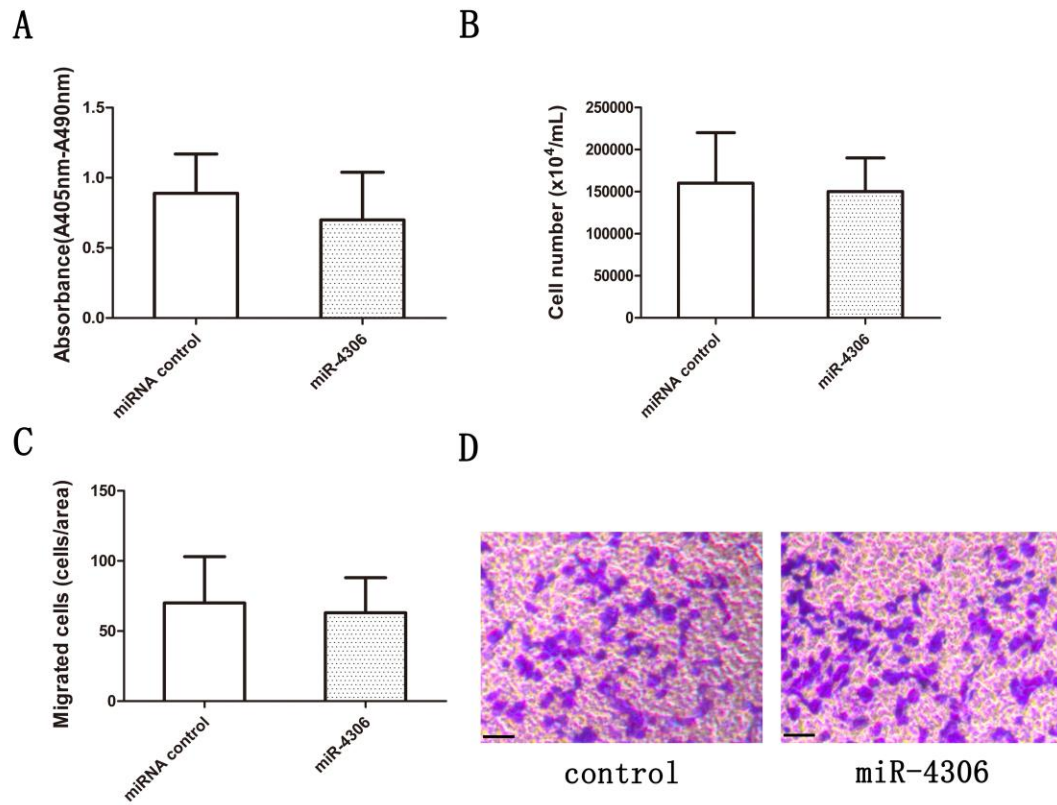

Supple fig 5

Supplementary Table 1 Clinical characteristics of patients

|                       | Control (n=15) | Elective PCI (n=18) | Emergency<br>(n=20) | PCI |
|-----------------------|----------------|---------------------|---------------------|-----|
| Age                   | 58.44±10.34    | 64.54±10.54         | 57.44±9.89          |     |
| Sex                   |                |                     |                     |     |
| Male                  | 7              | 10                  | 12                  |     |
| Female                | 8              | 8                   | 8                   |     |
| Family history (%)    | 13             | 16                  | 15                  |     |
| Diabetes mellitus (%) | 13             | 14                  | 13                  |     |
| Hypertension (%)      | 36             | 40                  | 35                  |     |
| Smoking (%)           | 15             | 40*                 | 45*                 |     |
| Medication            |                |                     |                     |     |

|                          |     |     |     |
|--------------------------|-----|-----|-----|
| Nitrates (%)             | 100 | 56  | 100 |
| Statins (%)              | 100 | 100 | 50  |
| Anti-platelet drugs (%)  | 100 | 100 | 40  |
| $\beta$ -Blocker (%)     | 67  | 100 | 55  |
| ACE/ARB inhibitors (%)   | 73  | 100 | 40  |
| Coronary artery diseases |     |     |     |
| 1-vessel disease         |     | 7   | 12  |
| 2-vessel diseases        |     | 7   | 5   |
| 3-vessel diseases        |     | 4   | 3   |

ACEI, angiotensin converting enzyme inhibitor; ARB, angiotensin receptor blocker. Continuous values are shown as the mean $\pm$ SD. \* $p$ < 0.05.

Supplementary Table 2.

| (mg/dl) | Control group    | TPCA-1 group      |
|---------|------------------|-------------------|
| TC      | 215.6 $\pm$ 76.3 | 167.3 $\pm$ 61.6* |
| FC      | 158.1 $\pm$ 65.4 | 103.4 $\pm$ 41.5* |
| CE      | 99.4 $\pm$ 27.8  | 61.7 $\pm$ 16.6*  |

Data are shown as the means  $\pm$  SD. FC: free cholesterol; TC: total cholesterol; CE: cholesterol ester. \* $p$ <0.05 versus control (HMDMs exposed to ox-LDL plus saline). (n=3).

Supplementary Table 3. Association between miR-4306 expression in plasma HM-EVs and lipid variables using multivariate regression analysis

| Variables | Plasma levels |                         |         |
|-----------|---------------|-------------------------|---------|
|           | r             | OR (95%CI) <sup>#</sup> | P value |
| TG        | 0.291         | 0.014 to 1.245          | 0.062   |
| TC        | 0.351         | 0.067 to 1.893          | 0.051   |
| HDL-C     | -0.191        | -0.139 to 1.310         | 0.079   |

|       |       |                |       |
|-------|-------|----------------|-------|
| LDL-C | 0.523 | 0.015 to 0.927 | 0.032 |
|-------|-------|----------------|-------|

---

#Adjusted by age, sex, BMI, blood pressure level and fasting blood glucose. TC, total cholesterol; TG, total triglyceride; HDL-C, high-density lipoprotein cholesterol; LDL-C, low-density lipoprotein cholesterol
